# Supplementary material for: Simulating the effect of tillage practices with the global ecosystem model LPJmL (version 5.0-tillage)
Source: Copernicus journal article supplement (doi:10.5194/gmd-12-2419-2019), 2019-06-19

NT\_R vs. T\_R Q50: -11.9% (Q5: -24.1%, Q95: 2.0%)

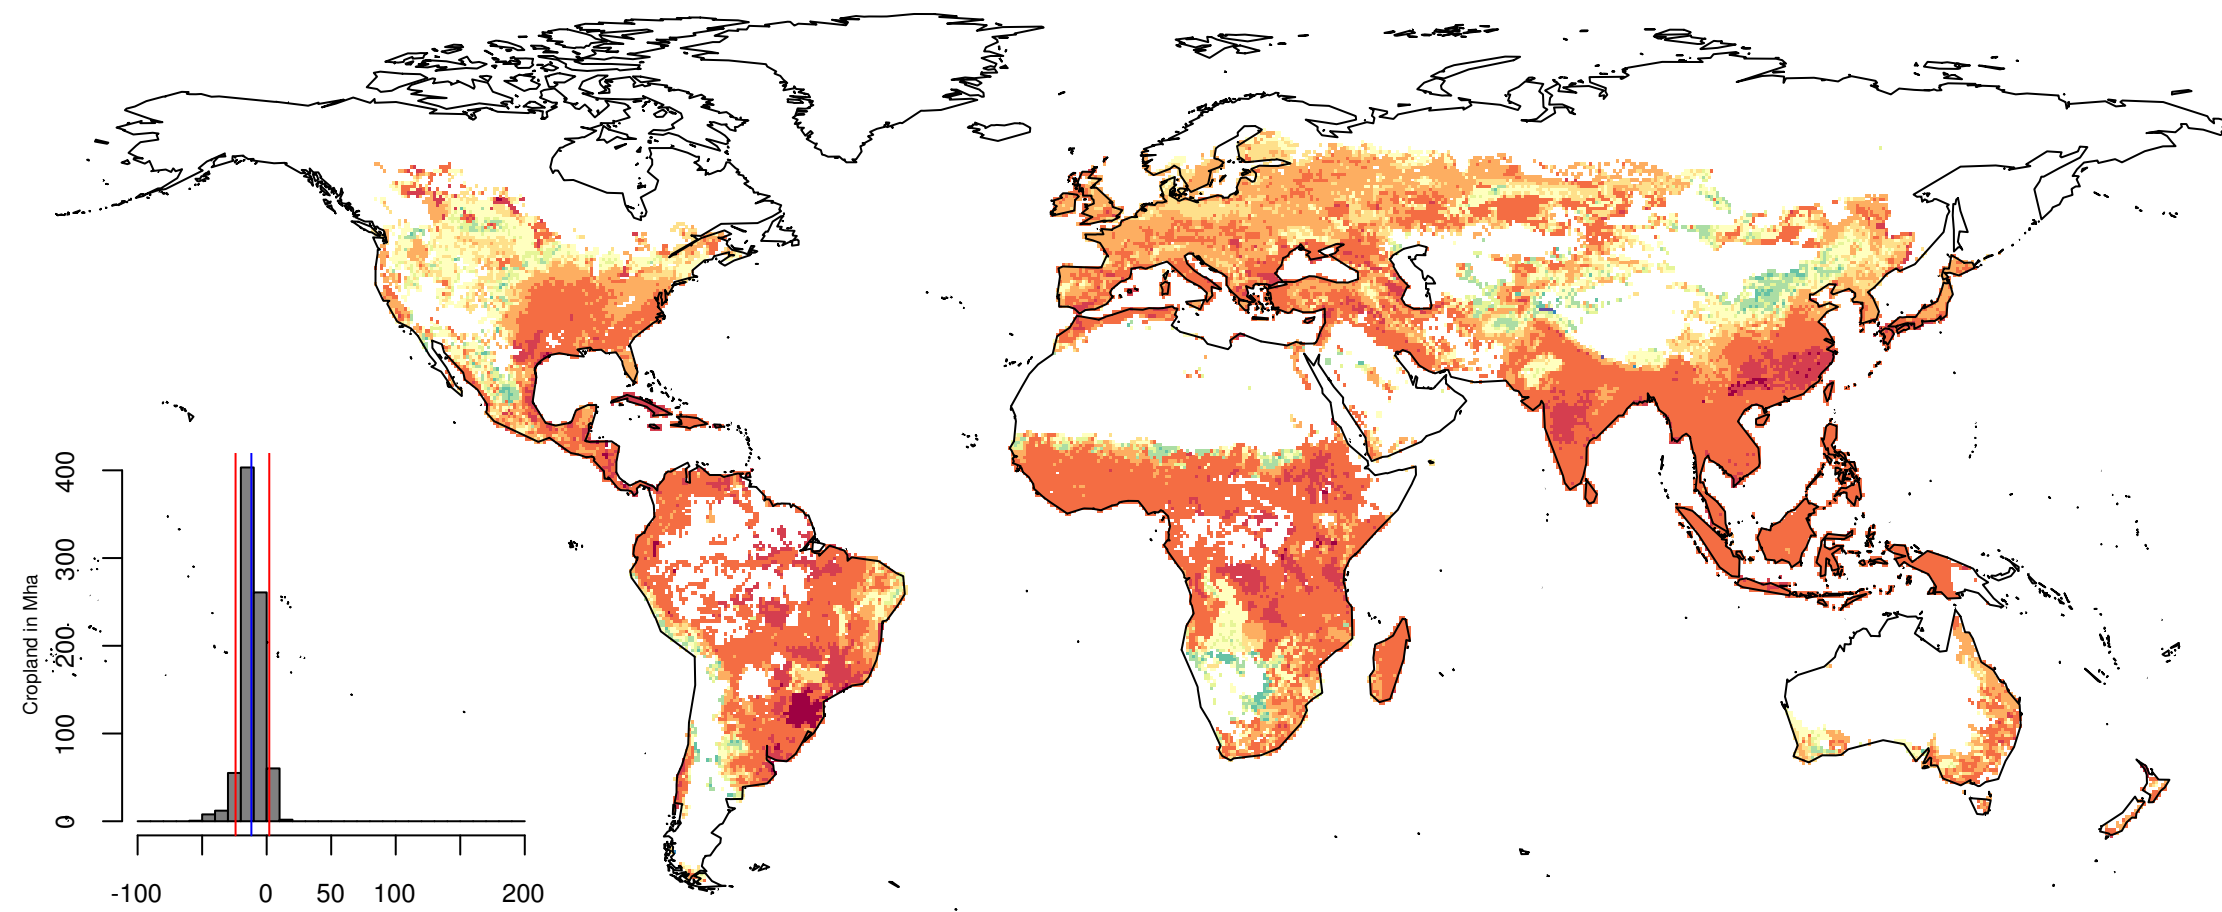

A: Relative CO<sub>2</sub> change from T\_R (%)

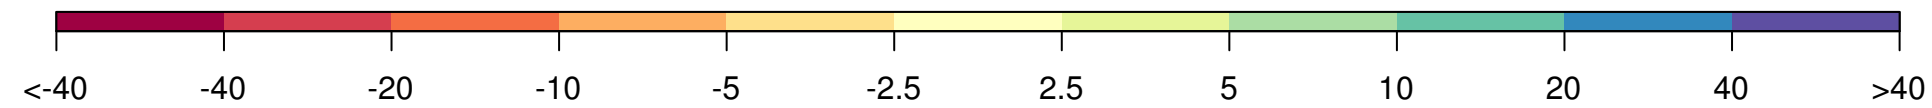

NT\_R vs. T\_R Q50: 1.8% (Q5: -11.0%, Q95: 25.8%)

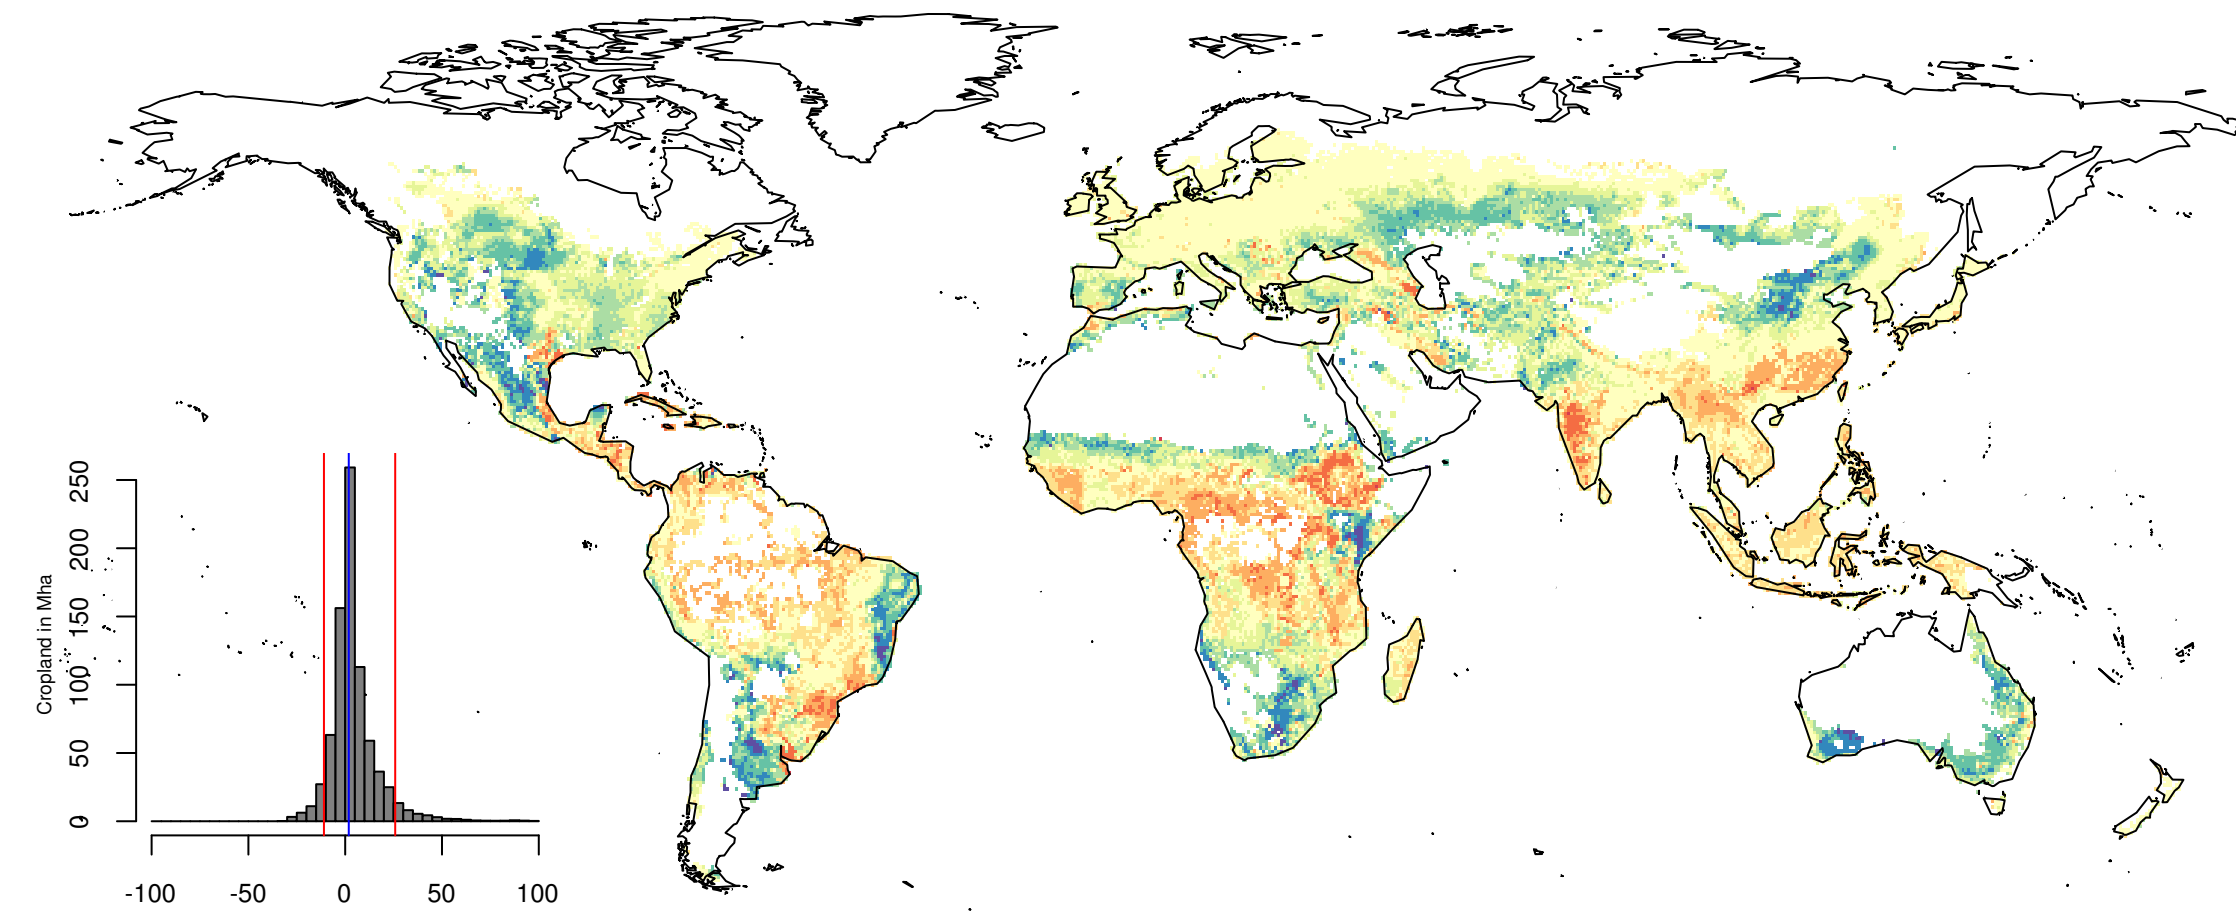

B: Relative carbon input change from T\_R (%)

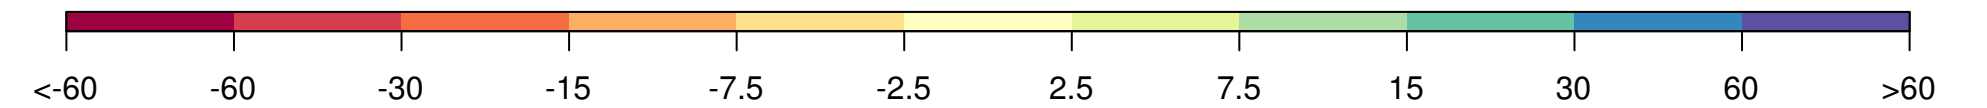

NT\_R vs. T\_R Q50: 14.5% (Q5: -1.5%, Q95: 33.0%)

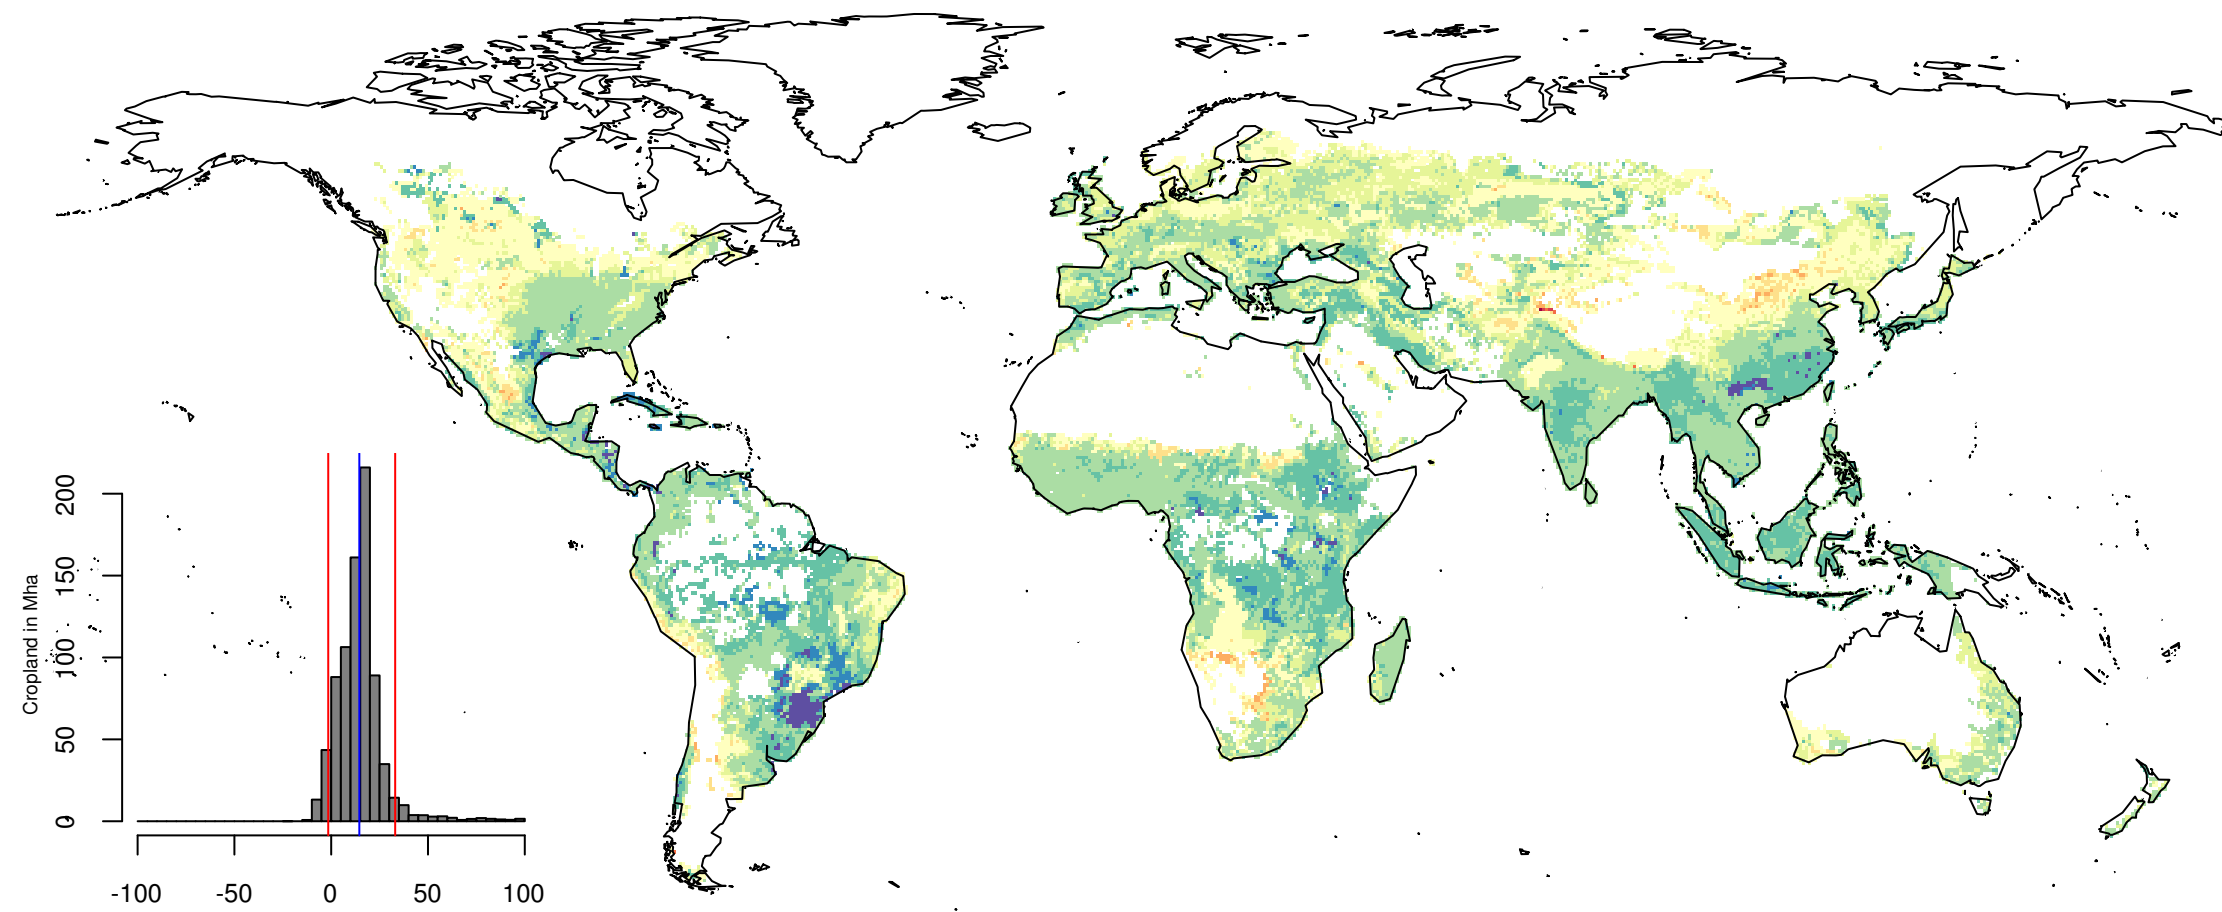

C: Relative change of soil carbon turnover time on cropland from T\_R (%)

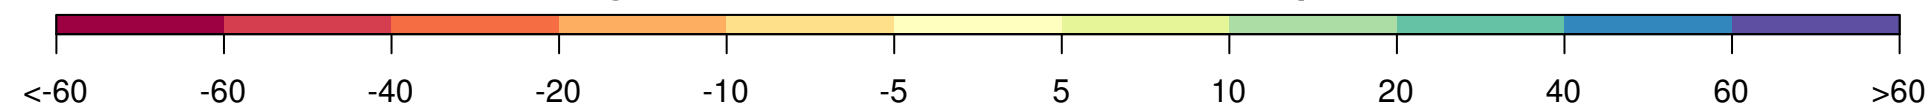

NT\_R vs. T\_R Q50: 2.5% (Q5: 0.6%, Q95: 5.1%)

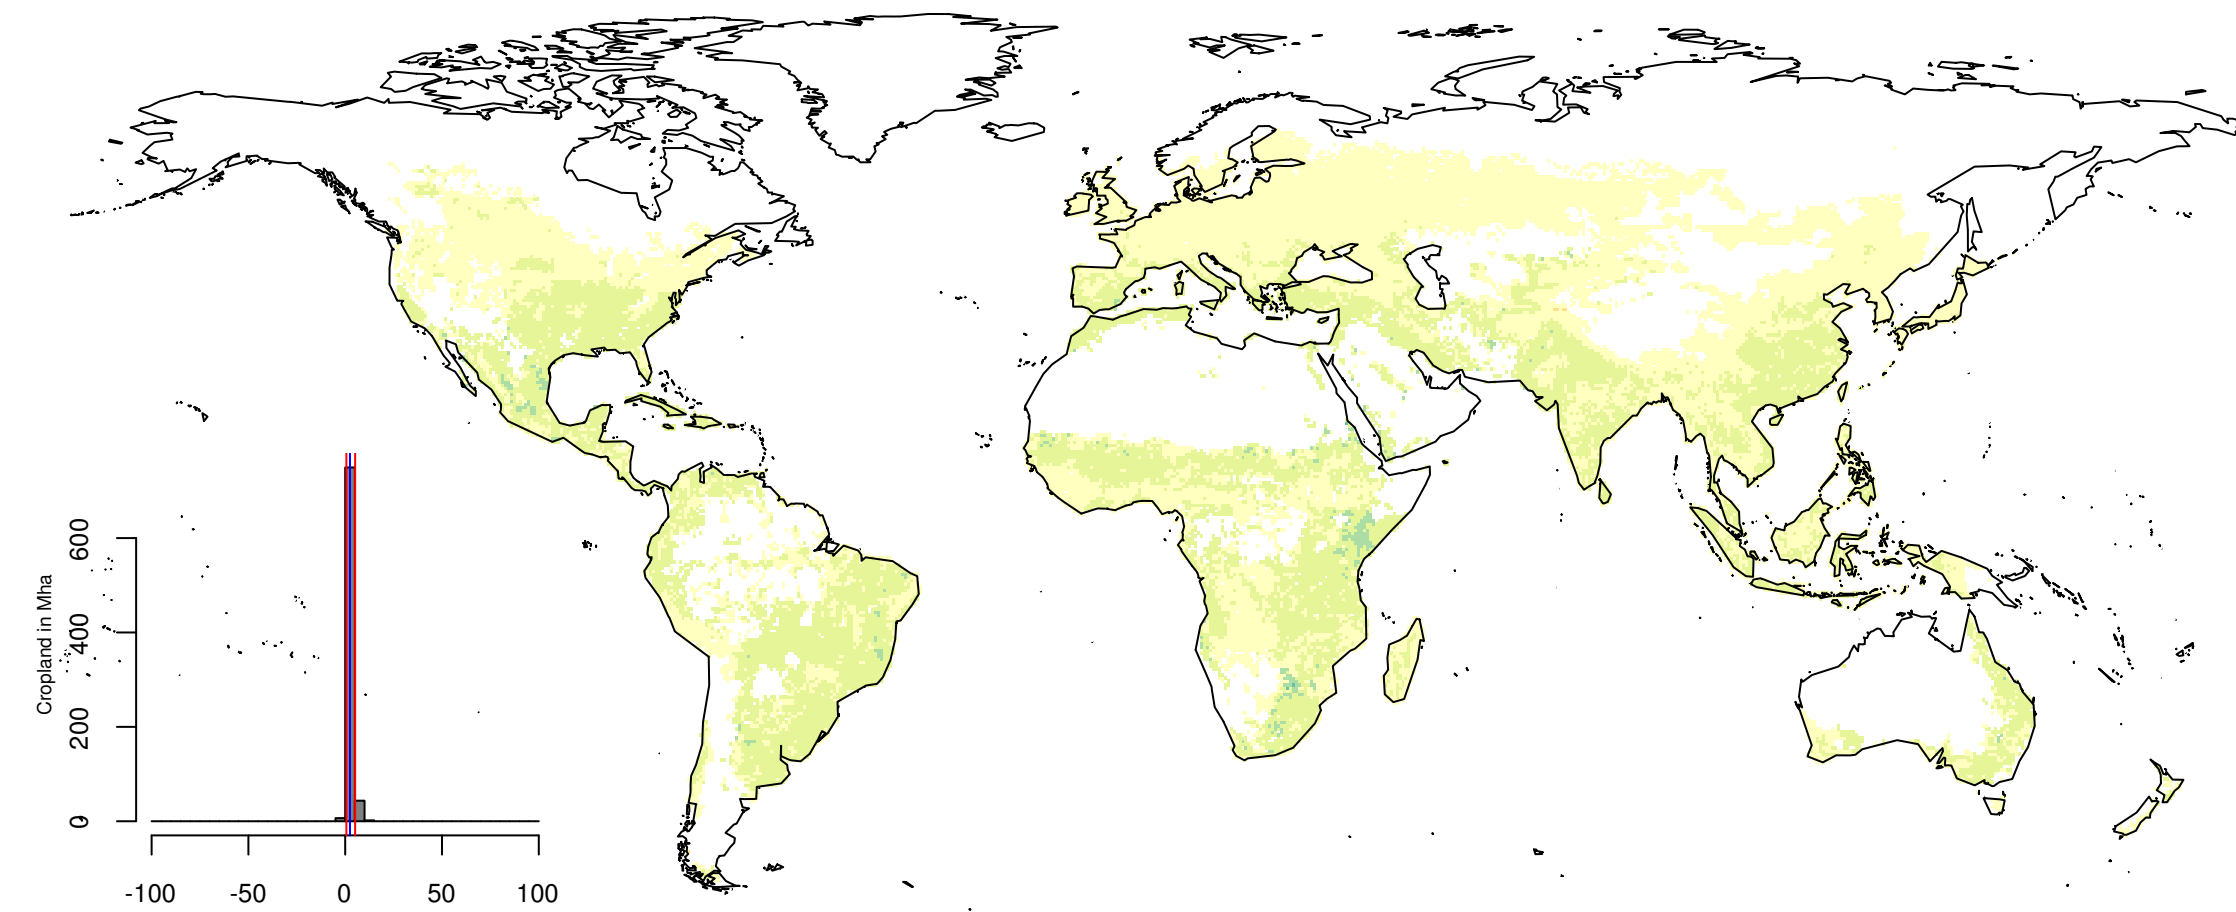

D: Relative topsoil (first 30cm) and litter C change from T\_R (%)

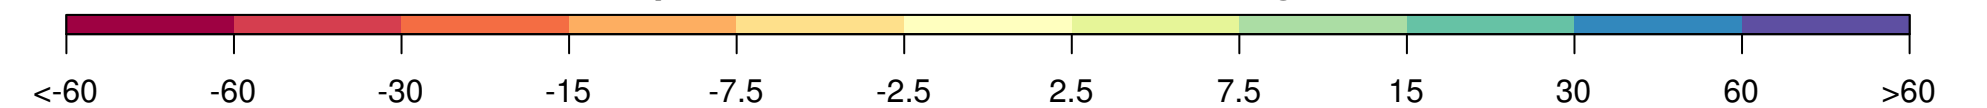

Supplement: Supplementary file 2 [file gmd-12-2419-2019-supplement.zip]
