# Supplementary material for: Simulating the effect of tillage practices with the global ecosystem model LPJmL (version 5.0-tillage)
Source: Copernicus journal article supplement (doi:10.5194/gmd-12-2419-2019), 2019-06-19

NT\_R vs. T\_R Q50: 20.8% (Q5: -3.6%, Q95: 325.5%)

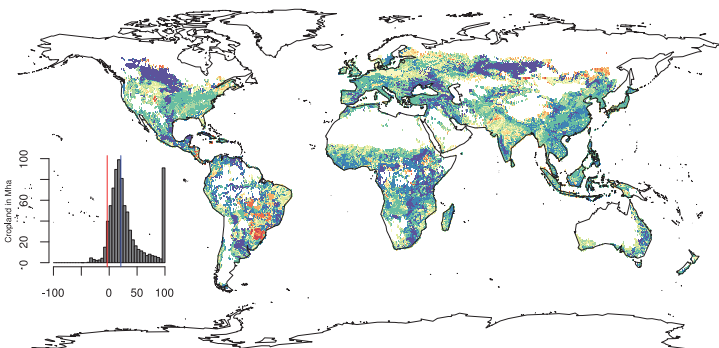

NT\_R vs. T\_R Q50: 23.2% (Q5: 6.0%, Q95: 182.3%)

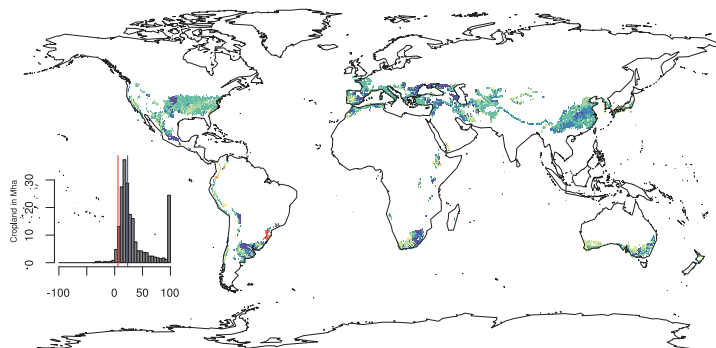

NT\_R vs. T\_R Q50: 15.8% (Q5: -7.3%, Q95: 72.1%)

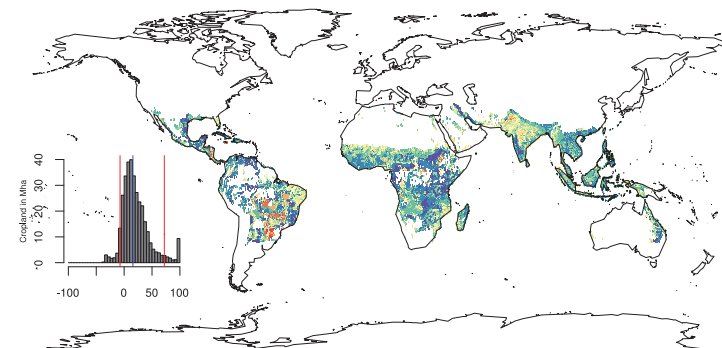

A: Relative N<sub>2</sub>O change from T\_R (%) - overall

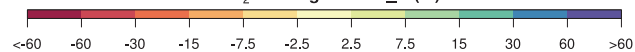

NT\_R vs. T\_R Q50: 21.1% (Q5: -1.8%, Q95: 496.3%)

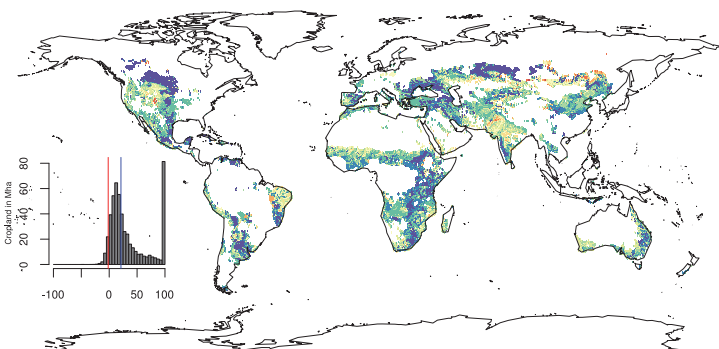

B: Relative N<sub>2</sub>O change from T\_R (%) - warm temperate

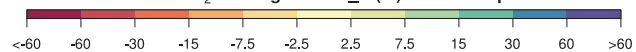

NT\_R vs. T\_R Q50: 23.5% (Q5: -0.1%, Q95: 664.4%)

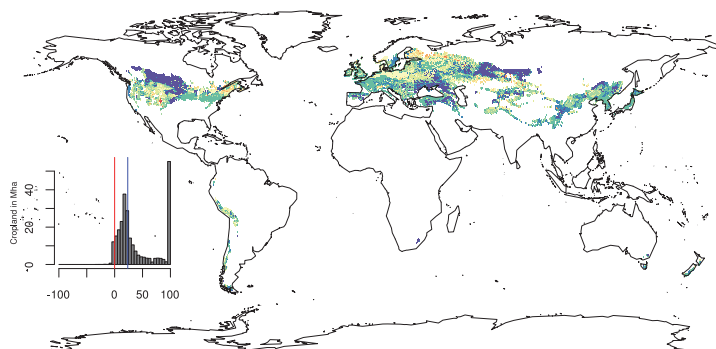

C: Relative N<sub>2</sub>O change from T\_R (%) - tropical

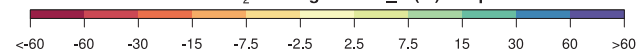

NT\_R vs. T\_R Q50: 20.7% (Q5: -9.1%, Q95: 63.8%)

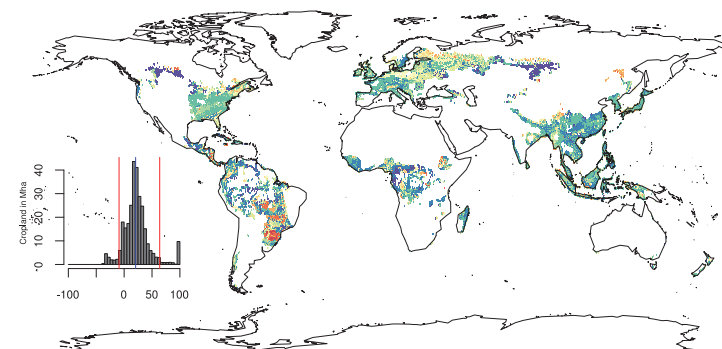

D: Relative N<sub>2</sub>O change from T\_R (%) - arid

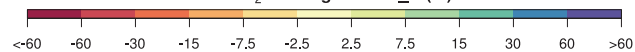

E: Relative N<sub>2</sub>O change from T\_R (%) - cold temperate

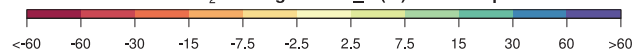

F: Relative N<sub>2</sub>O change from T\_R (%) - humid

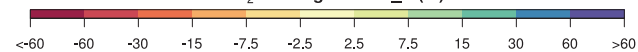

Supplement: Supplementary file 3 [file gmd-12-2419-2019-supplement.zip]
