# Supplementary material for: Simulating the effect of tillage practices with the global ecosystem model LPJmL (version 5.0-tillage)
Source: Copernicus journal article supplement (doi:10.5194/gmd-12-2419-2019), 2019-06-19

100\_res vs. 0\_res Q50: -6.6% (Q5: -26.1%, Q95: 20.3%)

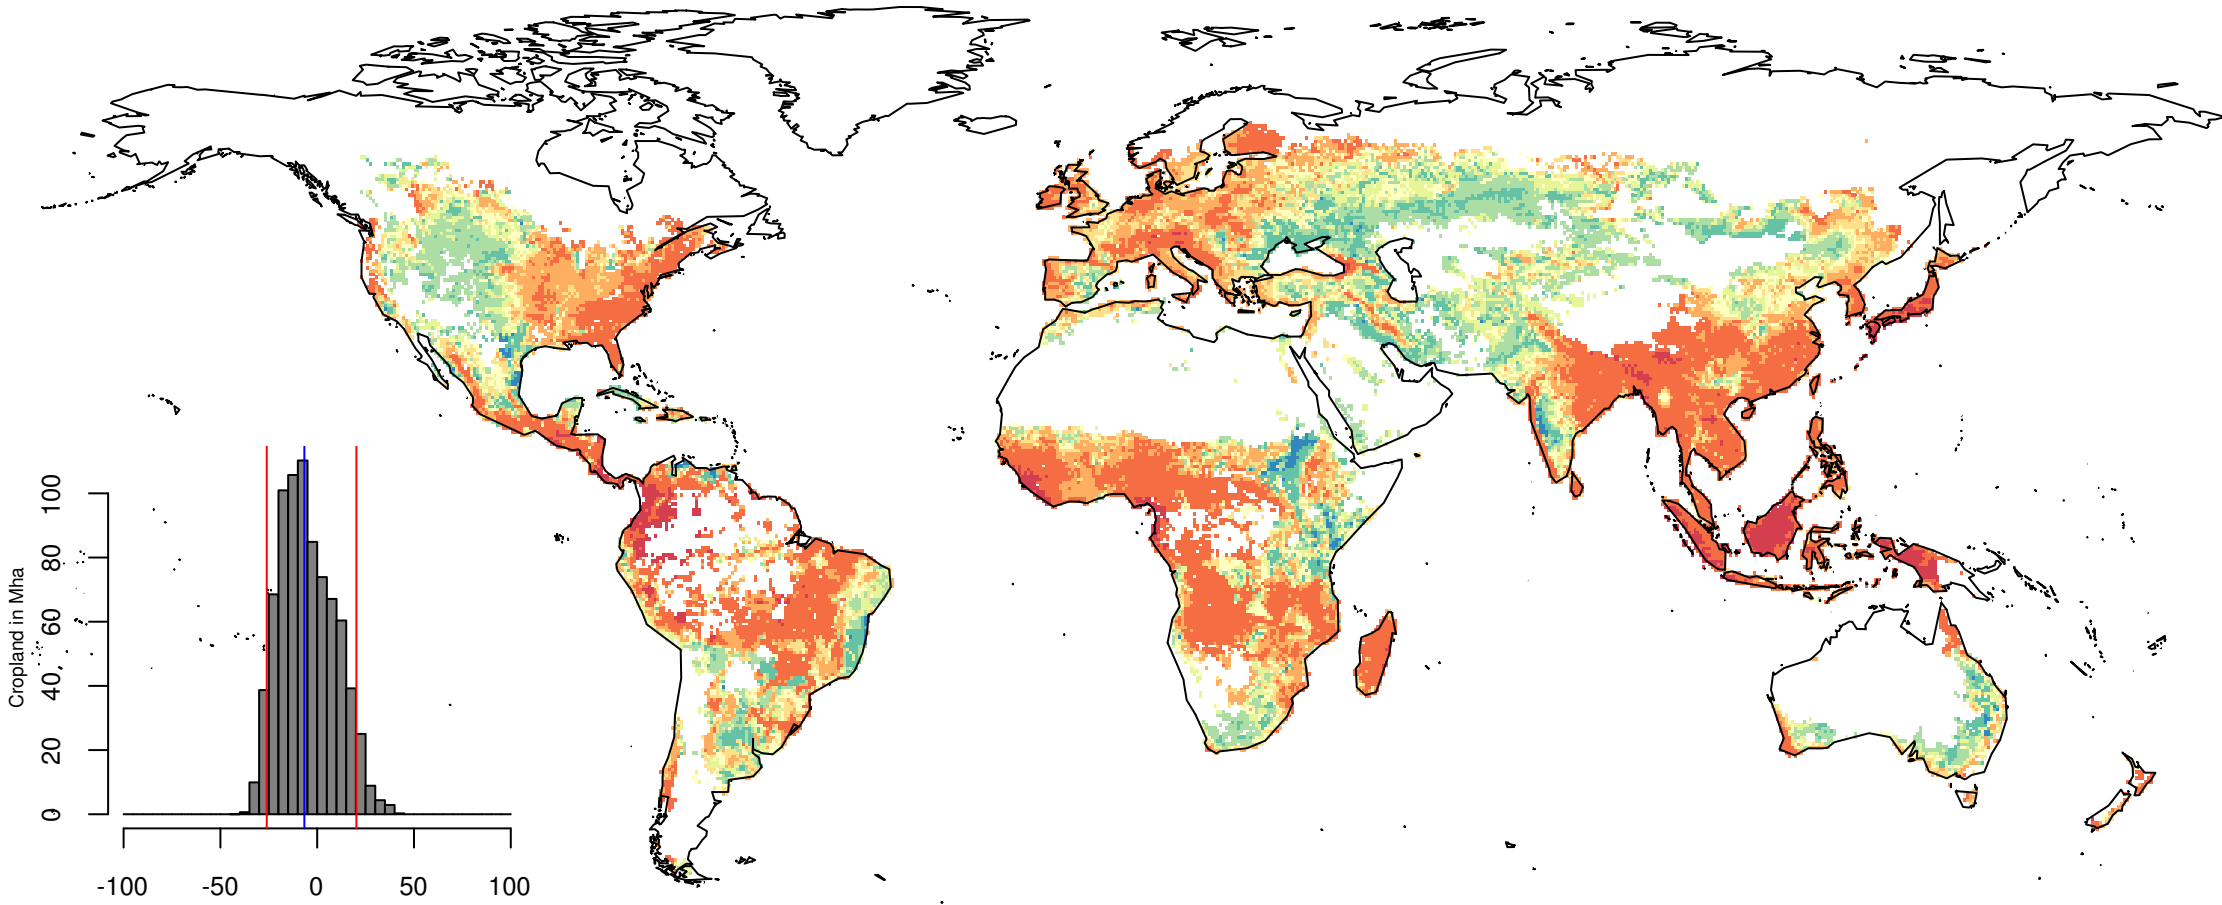

A: Relative evaporation change 100 g m<sup>2</sup> res vs. 0 g m<sup>2</sup> res (%)

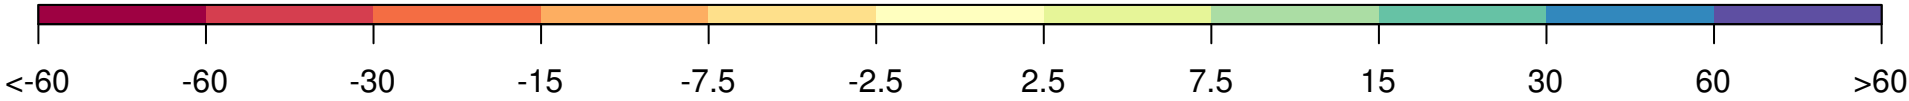

600\_res vs. 0\_res Q50: -72.6% (Q5: -81.5%, Q95: -49.1%)

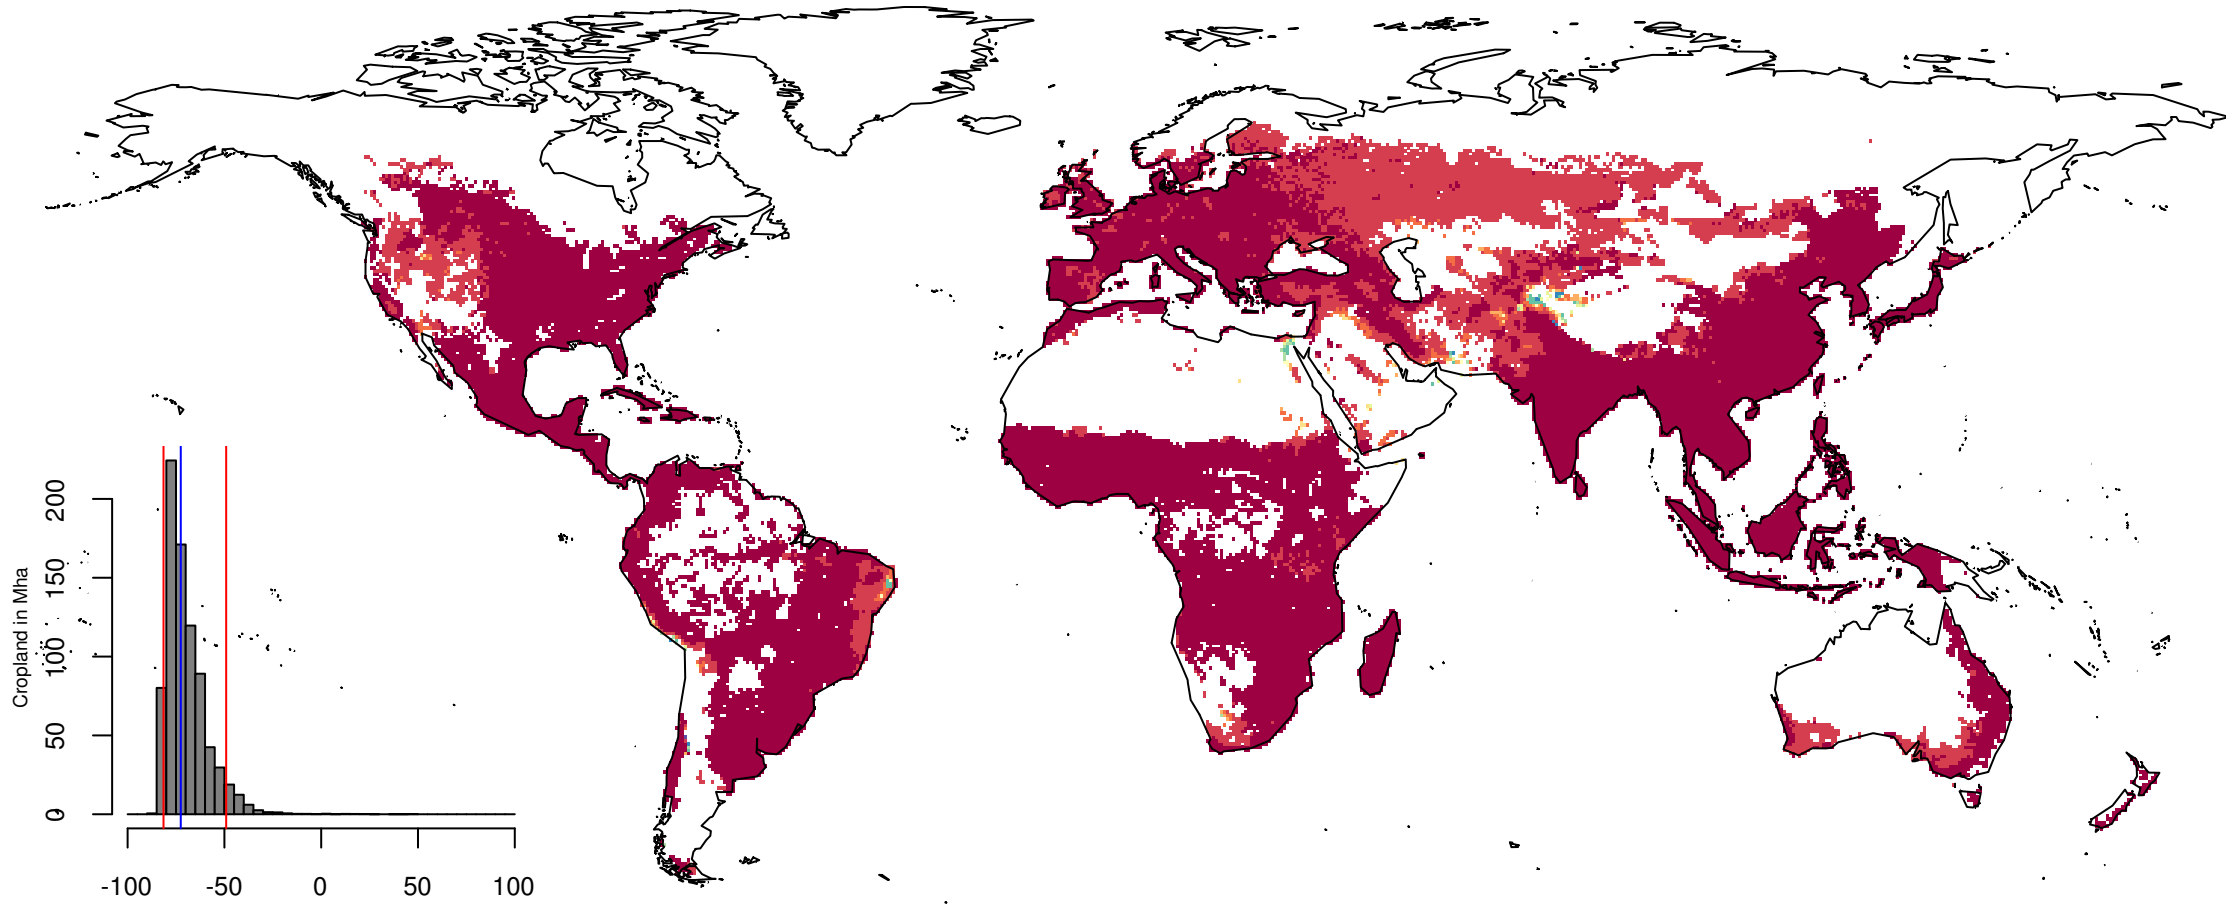

B: Relative evaporation change 600 g m<sup>2</sup> res vs. 0 g m<sup>2</sup> res (%)



Supplement: Supplementary file 4 [file gmd-12-2419-2019-supplement.zip]
