# Supplementary material for: Simulating the effect of tillage practices with the global ecosystem model LPJmL (version 5.0-tillage)
Source: Copernicus journal article supplement (doi:10.5194/gmd-12-2419-2019), 2019-06-19

NT\_R vs. T\_R Q50: 2.3% (Q5: -16.6%, Q95: 33.5%)

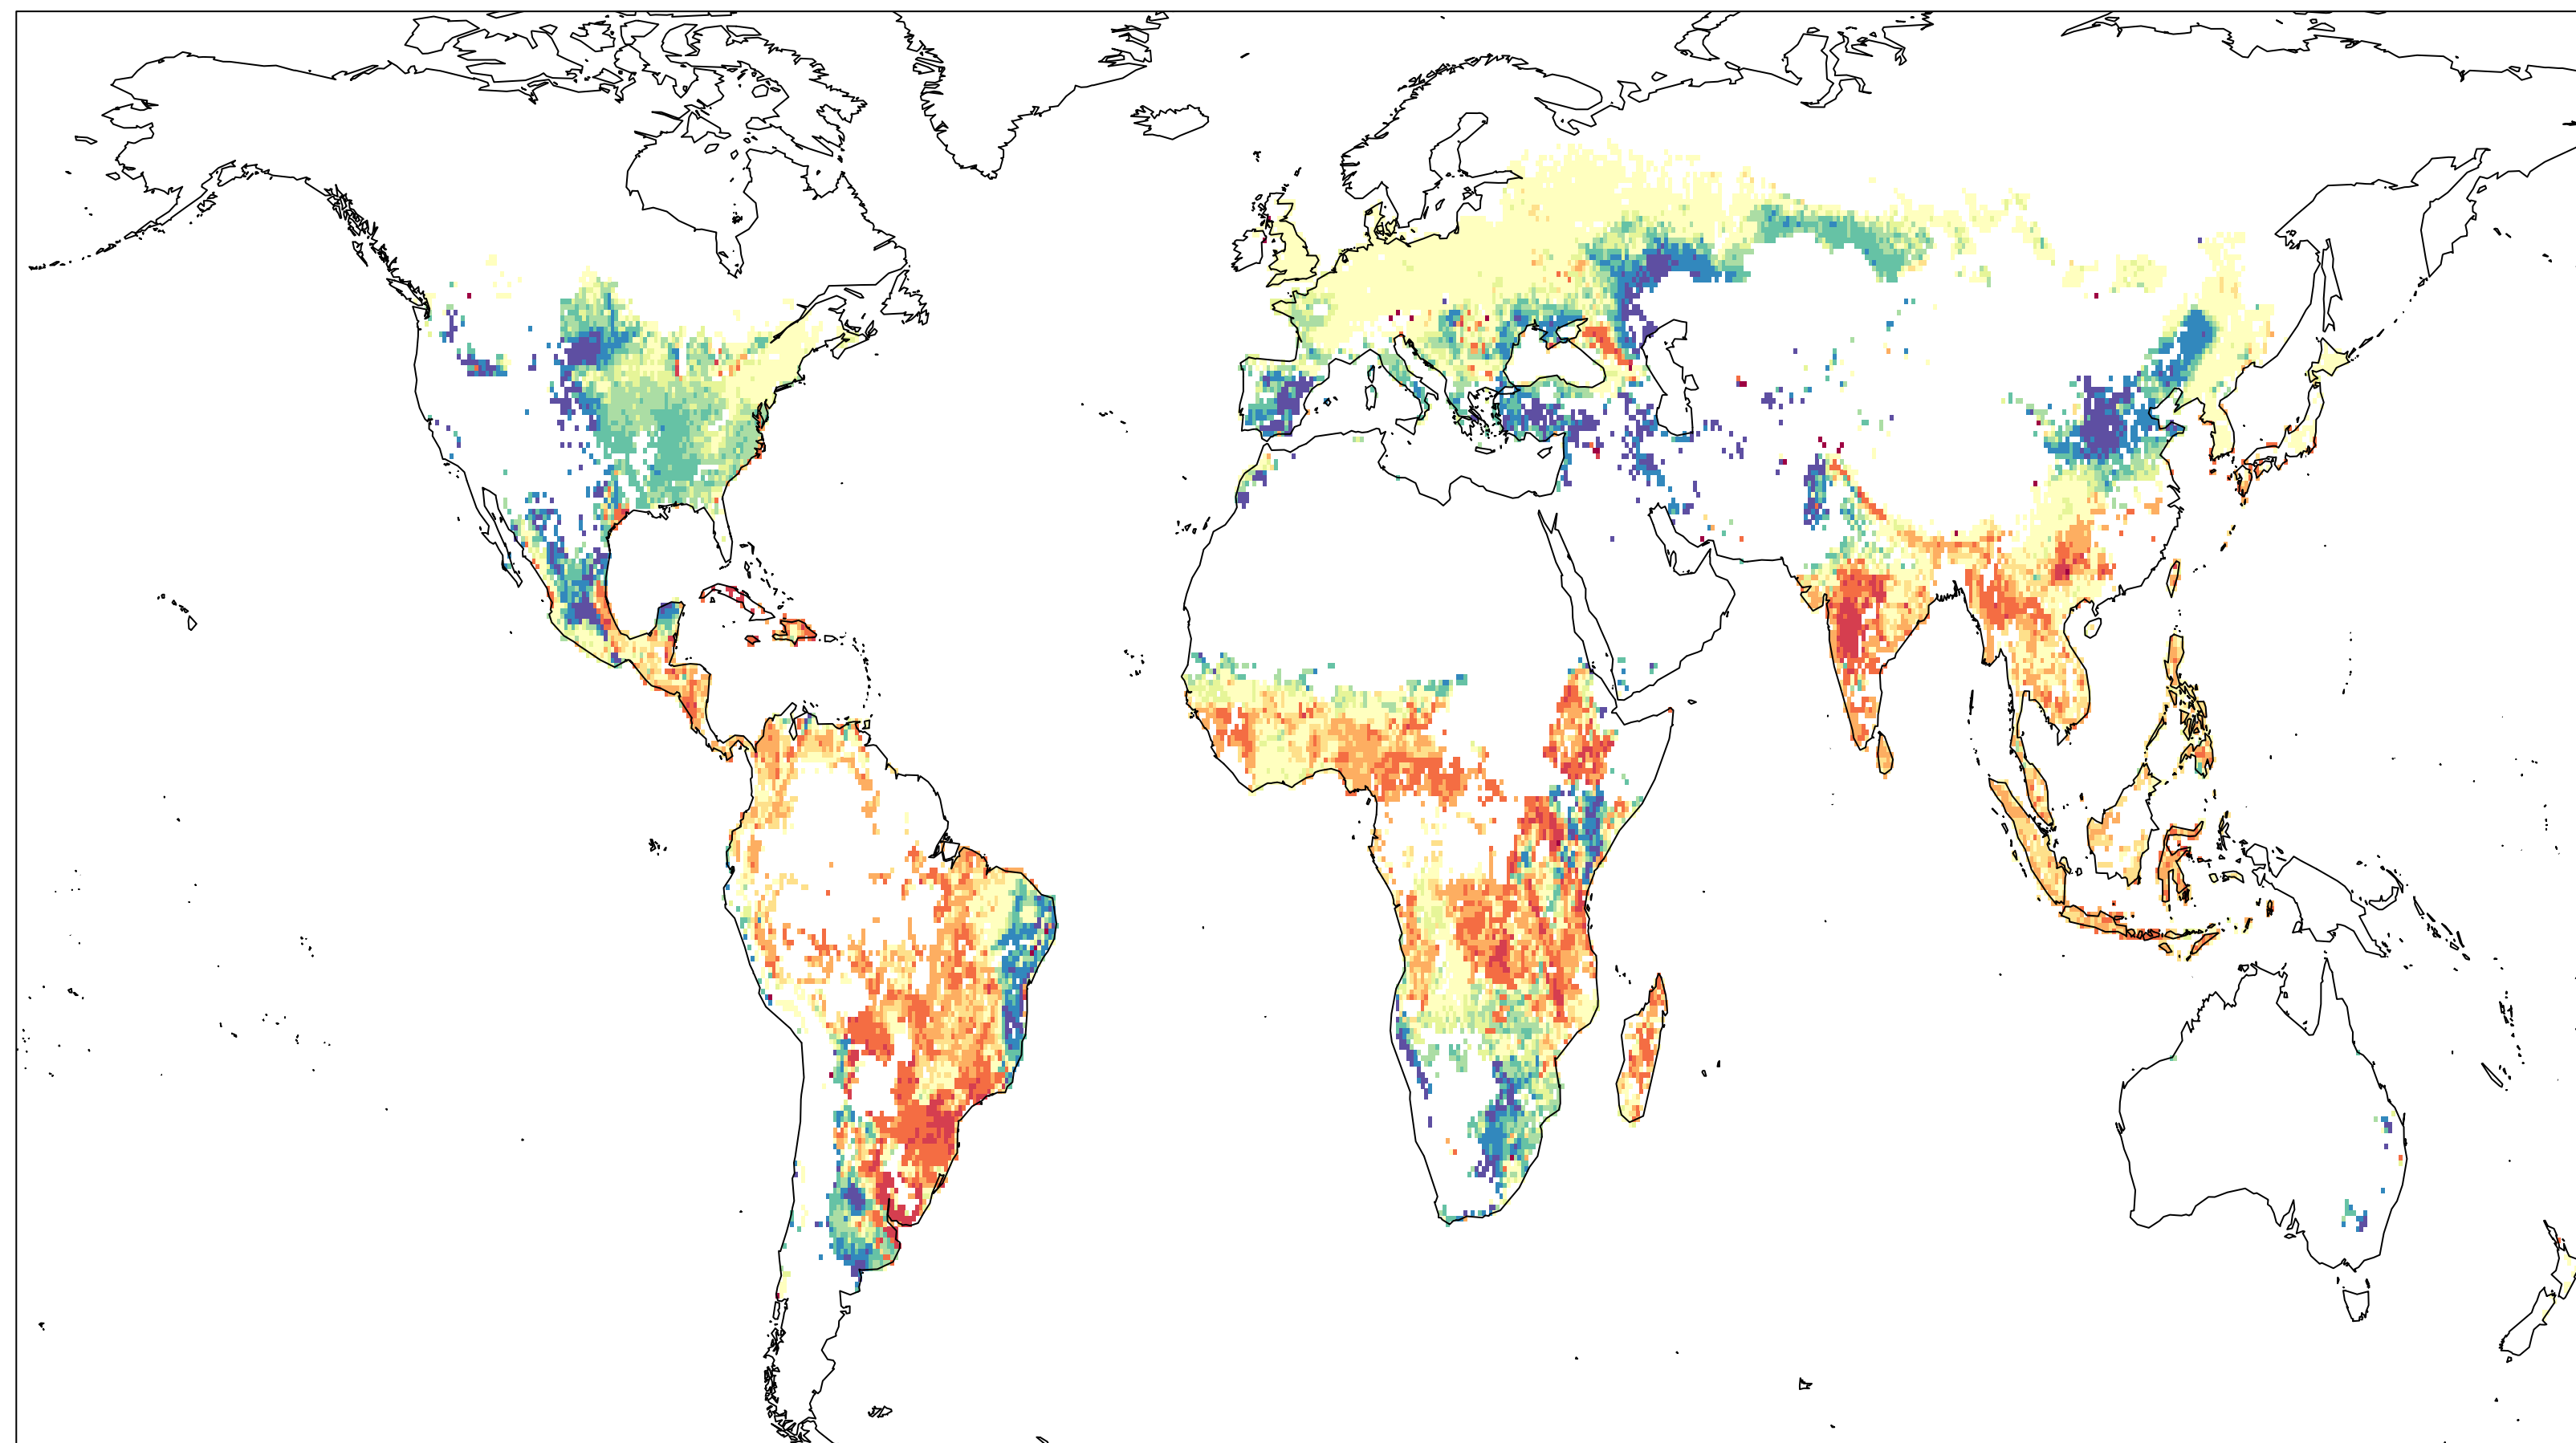

B: Relative change of rainfed maize yield from T\_R (%)

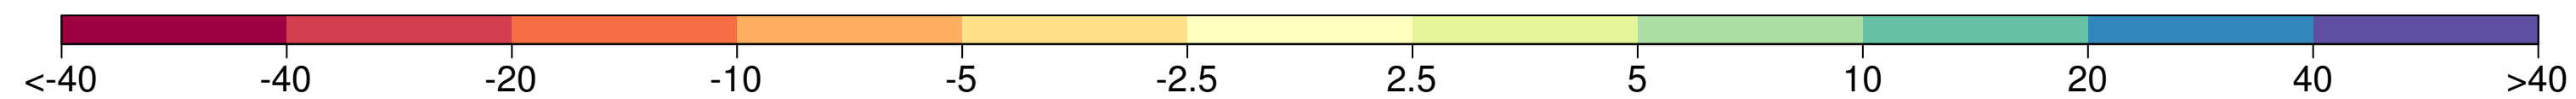

Relative change of yield (%) from T\_R compared to aridity indexes

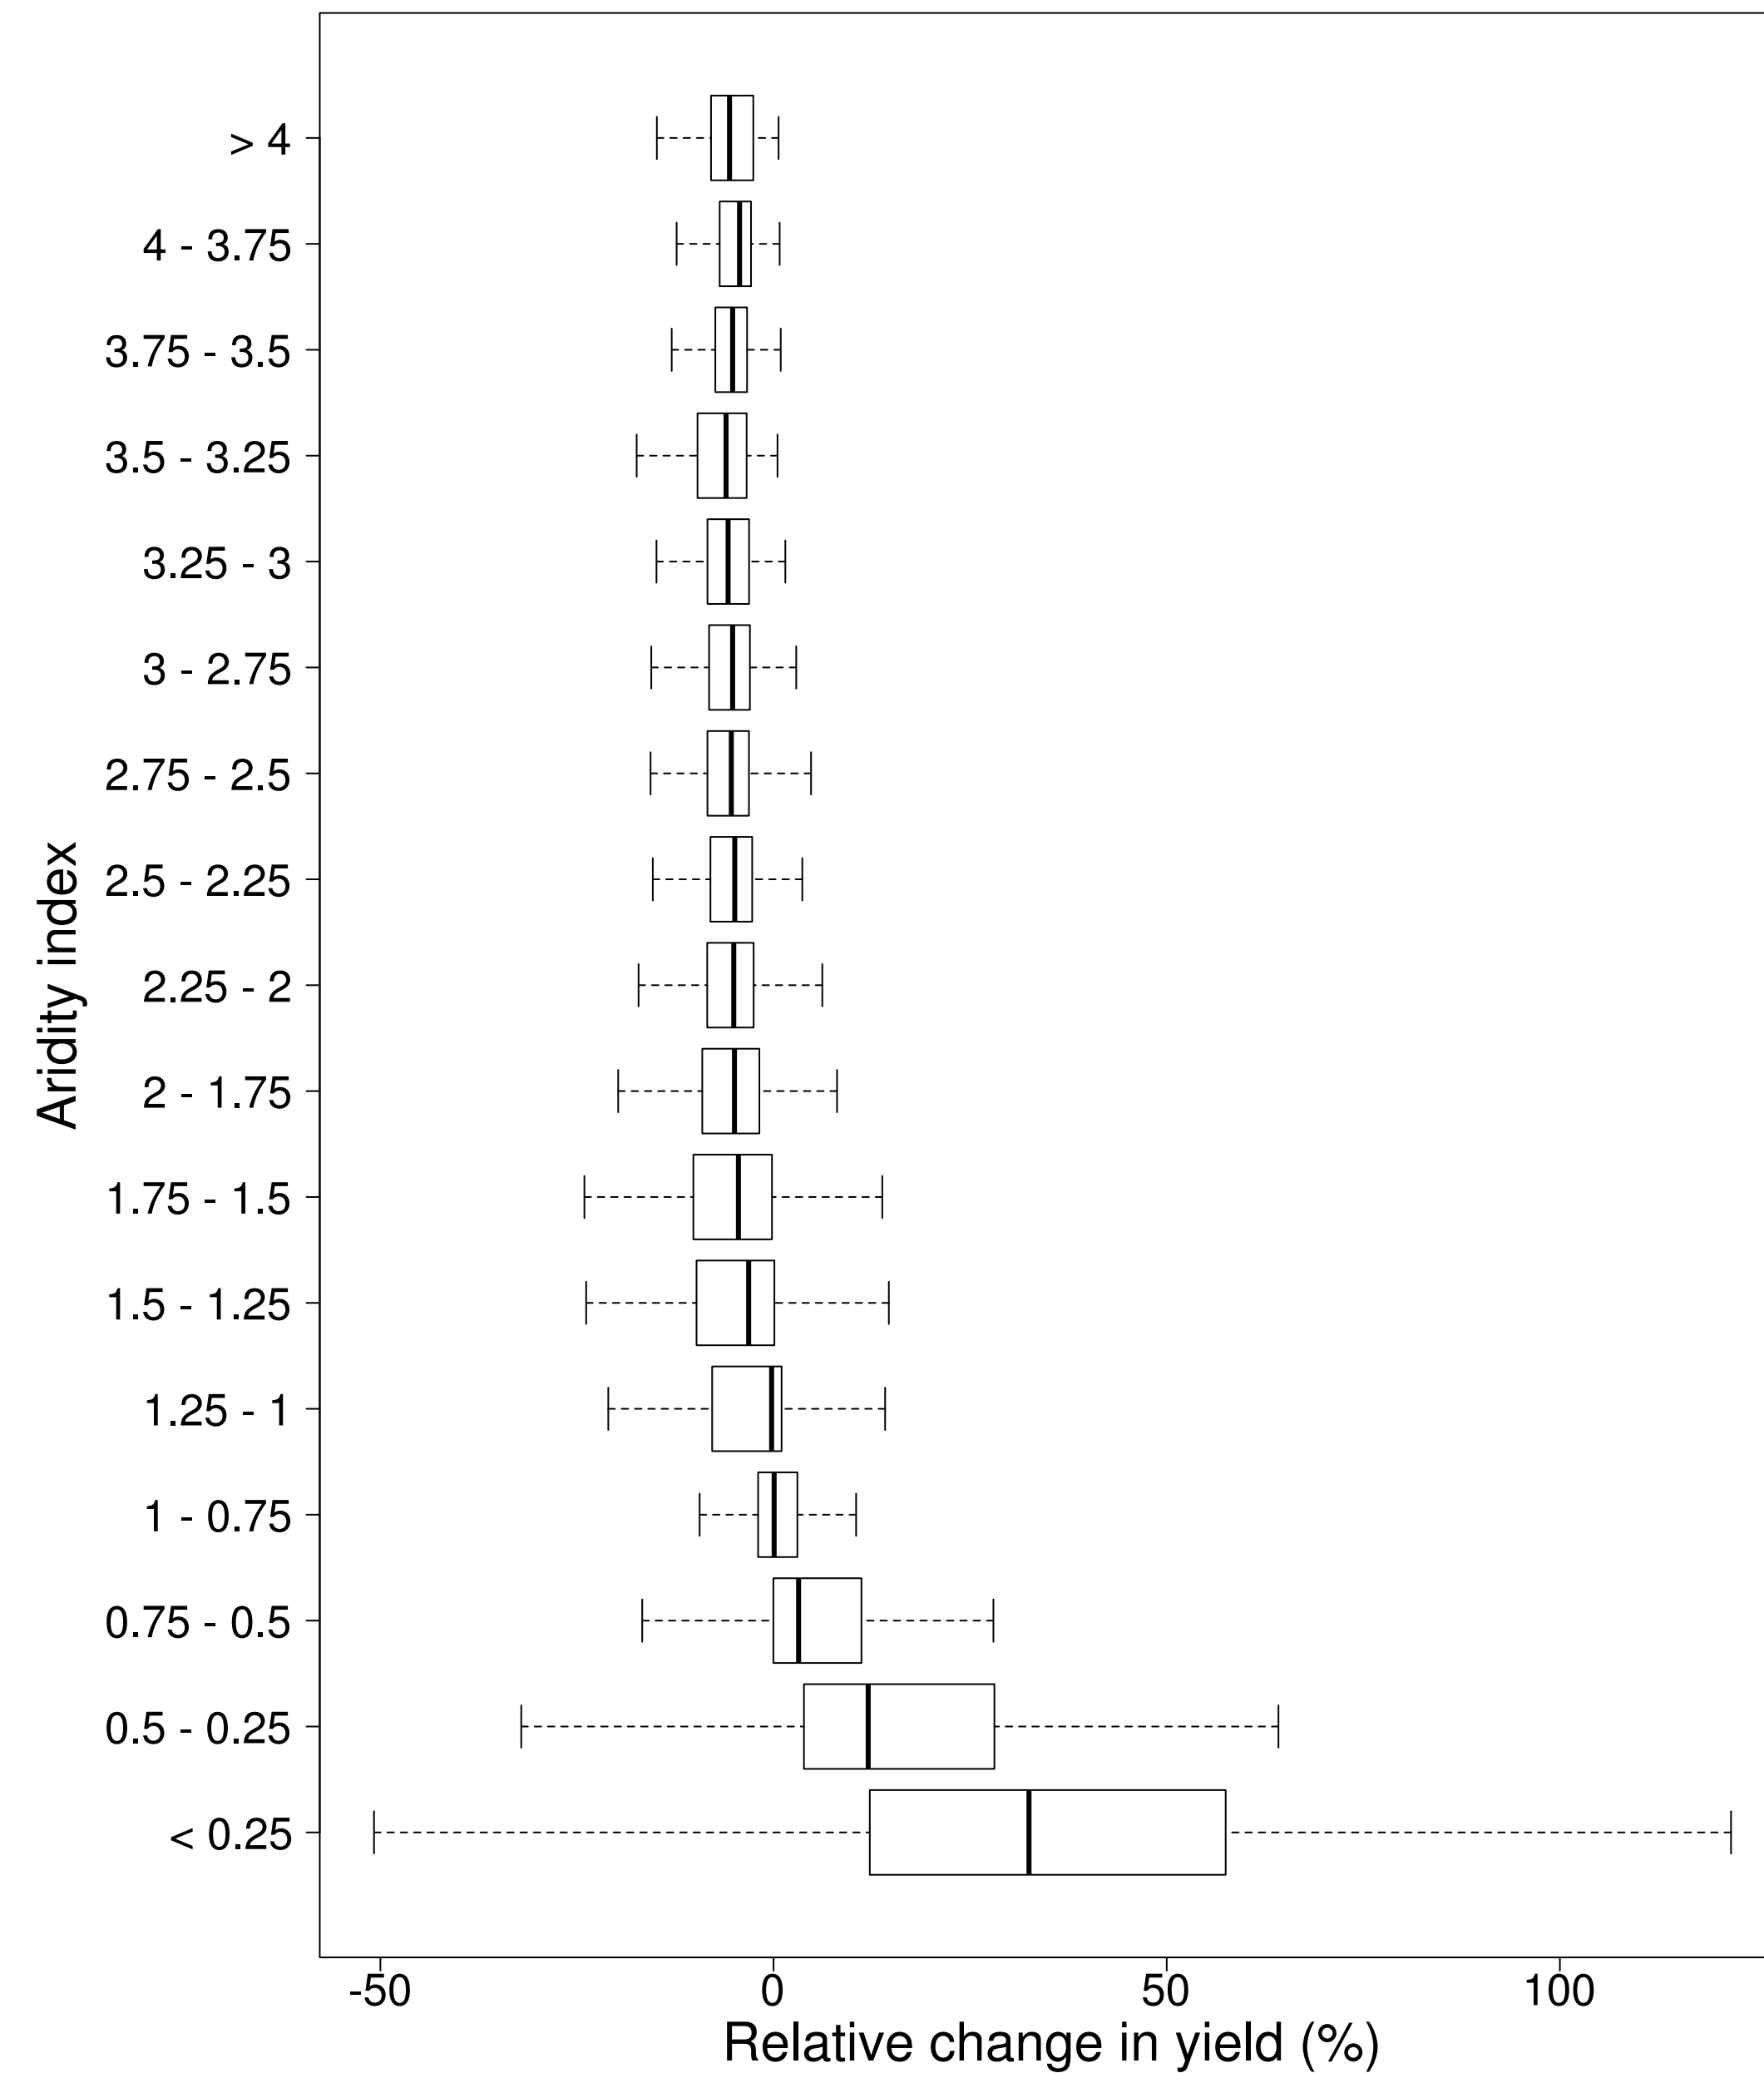

Supplement: Supplementary file 6 [file gmd-12-2419-2019-supplement.zip]
