# Supplementary material for: Simulating the effect of tillage practices with the global ecosystem model LPJmL (version 5.0-tillage)
Source: Copernicus journal article supplement (doi:10.5194/gmd-12-2419-2019), 2019-06-19
Supplement: Supplementary file 7 [file gmd-12-2419-2019-supplement.zip]

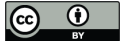

## *Supplement of*

# **Simulating the effect of tillage practices with the global ecosystem model LPJmL (version 5.0-tillage)**

**Femke Lutz et al.**

*Correspondence to:* Femke Lutz ([femke.lutz@pik-potsdam.de](mailto:femke.lutz@pik-potsdam.de))

- [gmd-12-2419-2019-supplement-title-page.pdf](#)
- [s01.pdf](#)
- [s02a.pdf](#)
- [s02b.pdf](#)
- [s03.pdf](#)
- [s04.pdf](#)
- [s05.pdf](#)
- [s06.pdf](#)
- [s07.pdf](#)

The copyright of individual parts of the supplement might differ from the CC BY 4.0 License.
