# Supplementary material for: Simulating the effect of tillage practices with the global ecosystem model LPJmL (version 5.0-tillage)
Source: Copernicus journal article supplement (doi:10.5194/gmd-12-2419-2019), 2019-06-19

NT\_R vs. T\_R Q50: -44.3% (Q5: -64.5%, Q95: -17.4%)

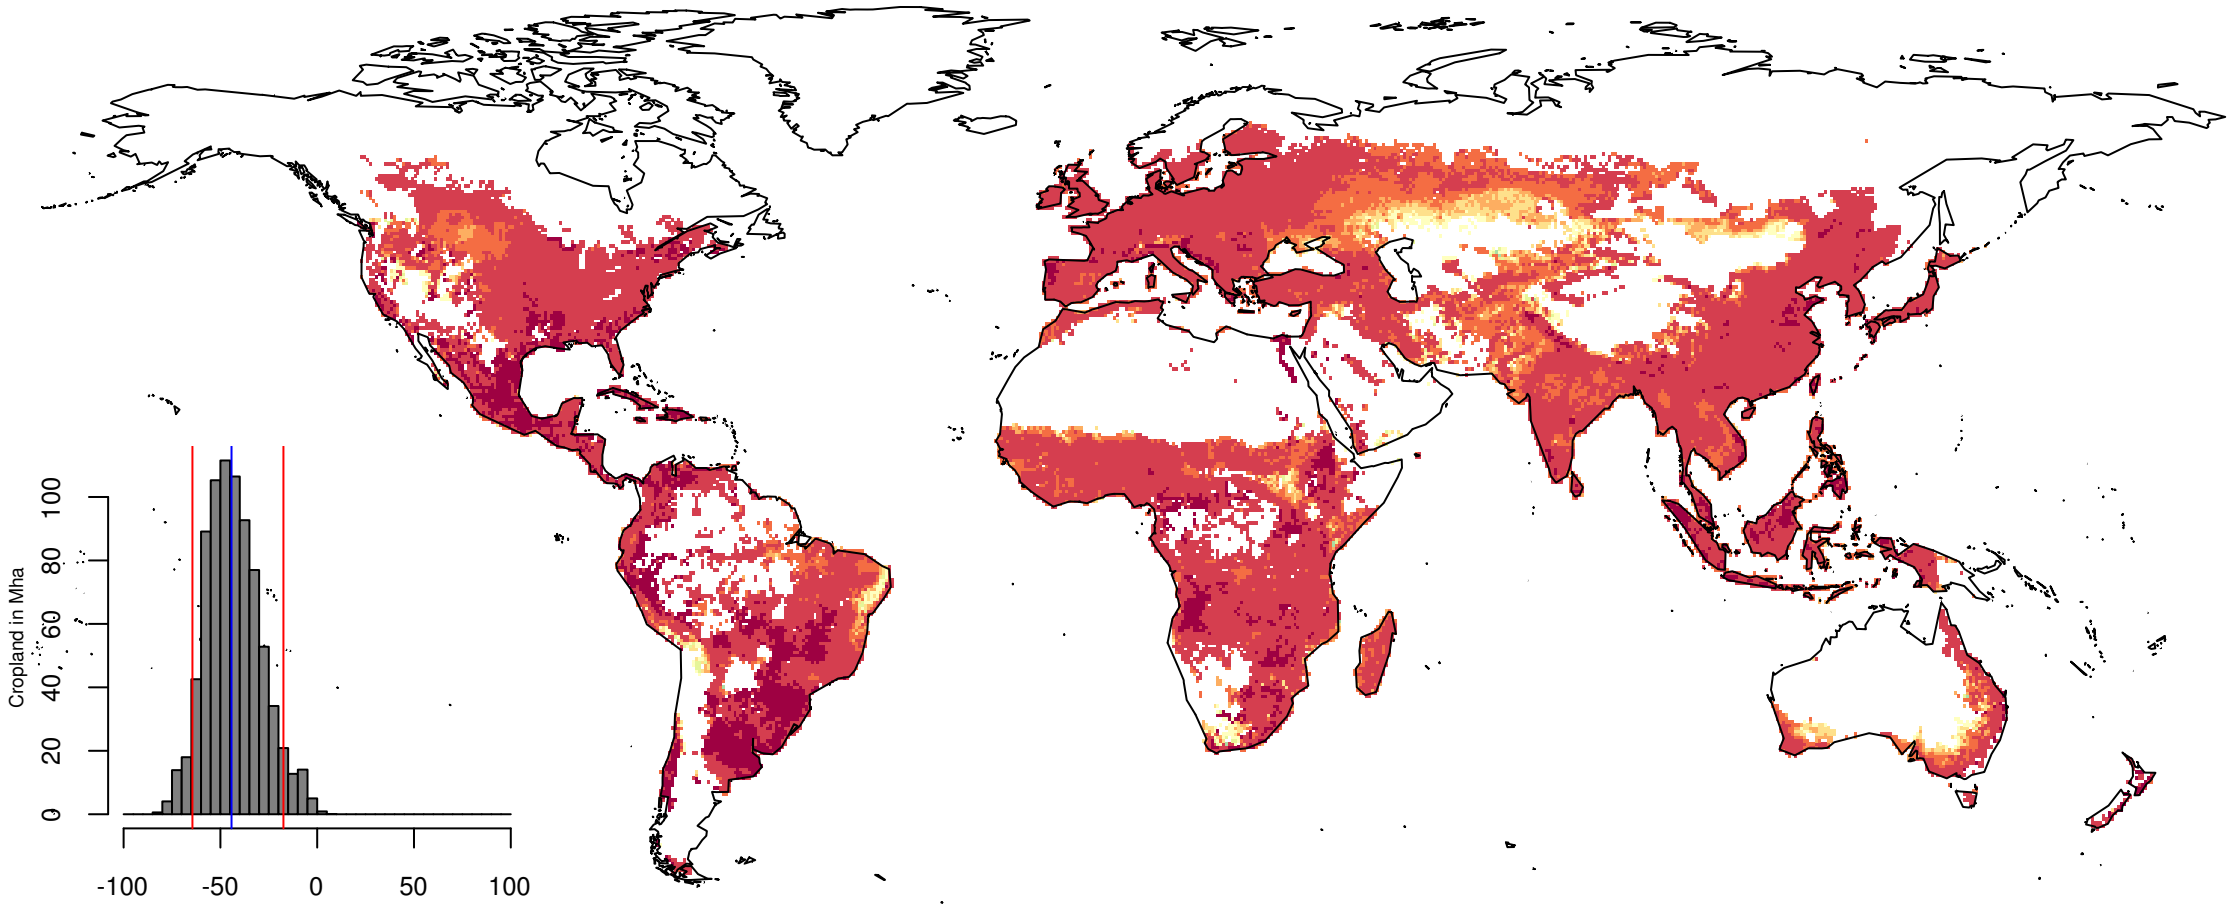

A: Relative evaporation change from T\_R (%)

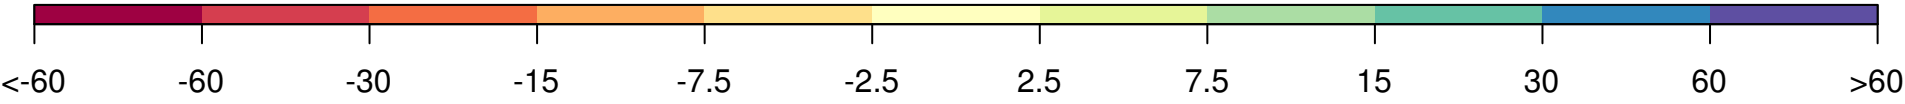

NT\_R vs. T\_R Q50: -57.8% (Q5: -74.6%, Q95: -26.1%)

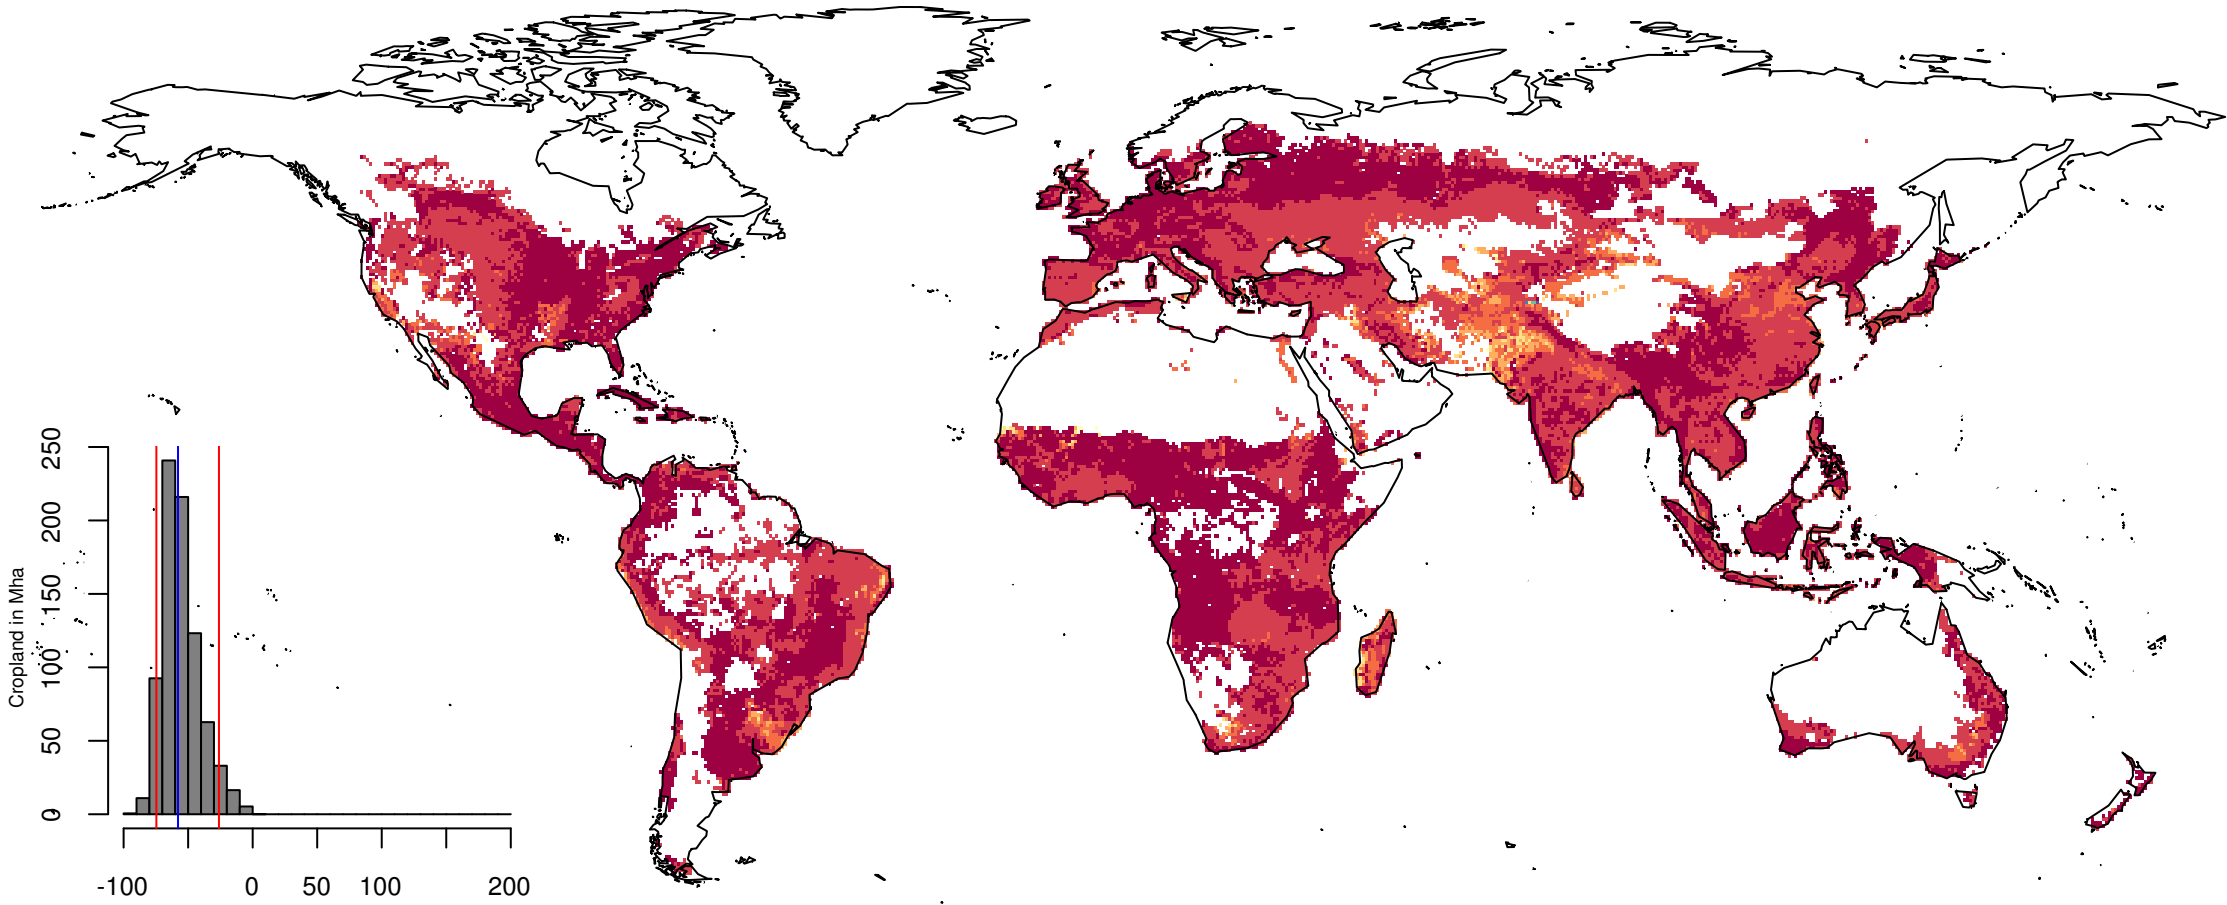

B: Relative surface runoff change from T\_R (%)



Supplement: Supplementary file 9 [file gmd-12-2419-2019-supplement.zip]
