# Supplementary figures and images for: Simulating the effect of tillage practices with the global ecosystem model LPJmL (version 5.0-tillage)
Source: Copernicus journal article supplement (doi:10.5194/gmd-12-2419-2019), 2019-06-19

NT\_R vs. T\_R Q50: 2.0% (Q5: -79.3%, Q95: 402.1%)

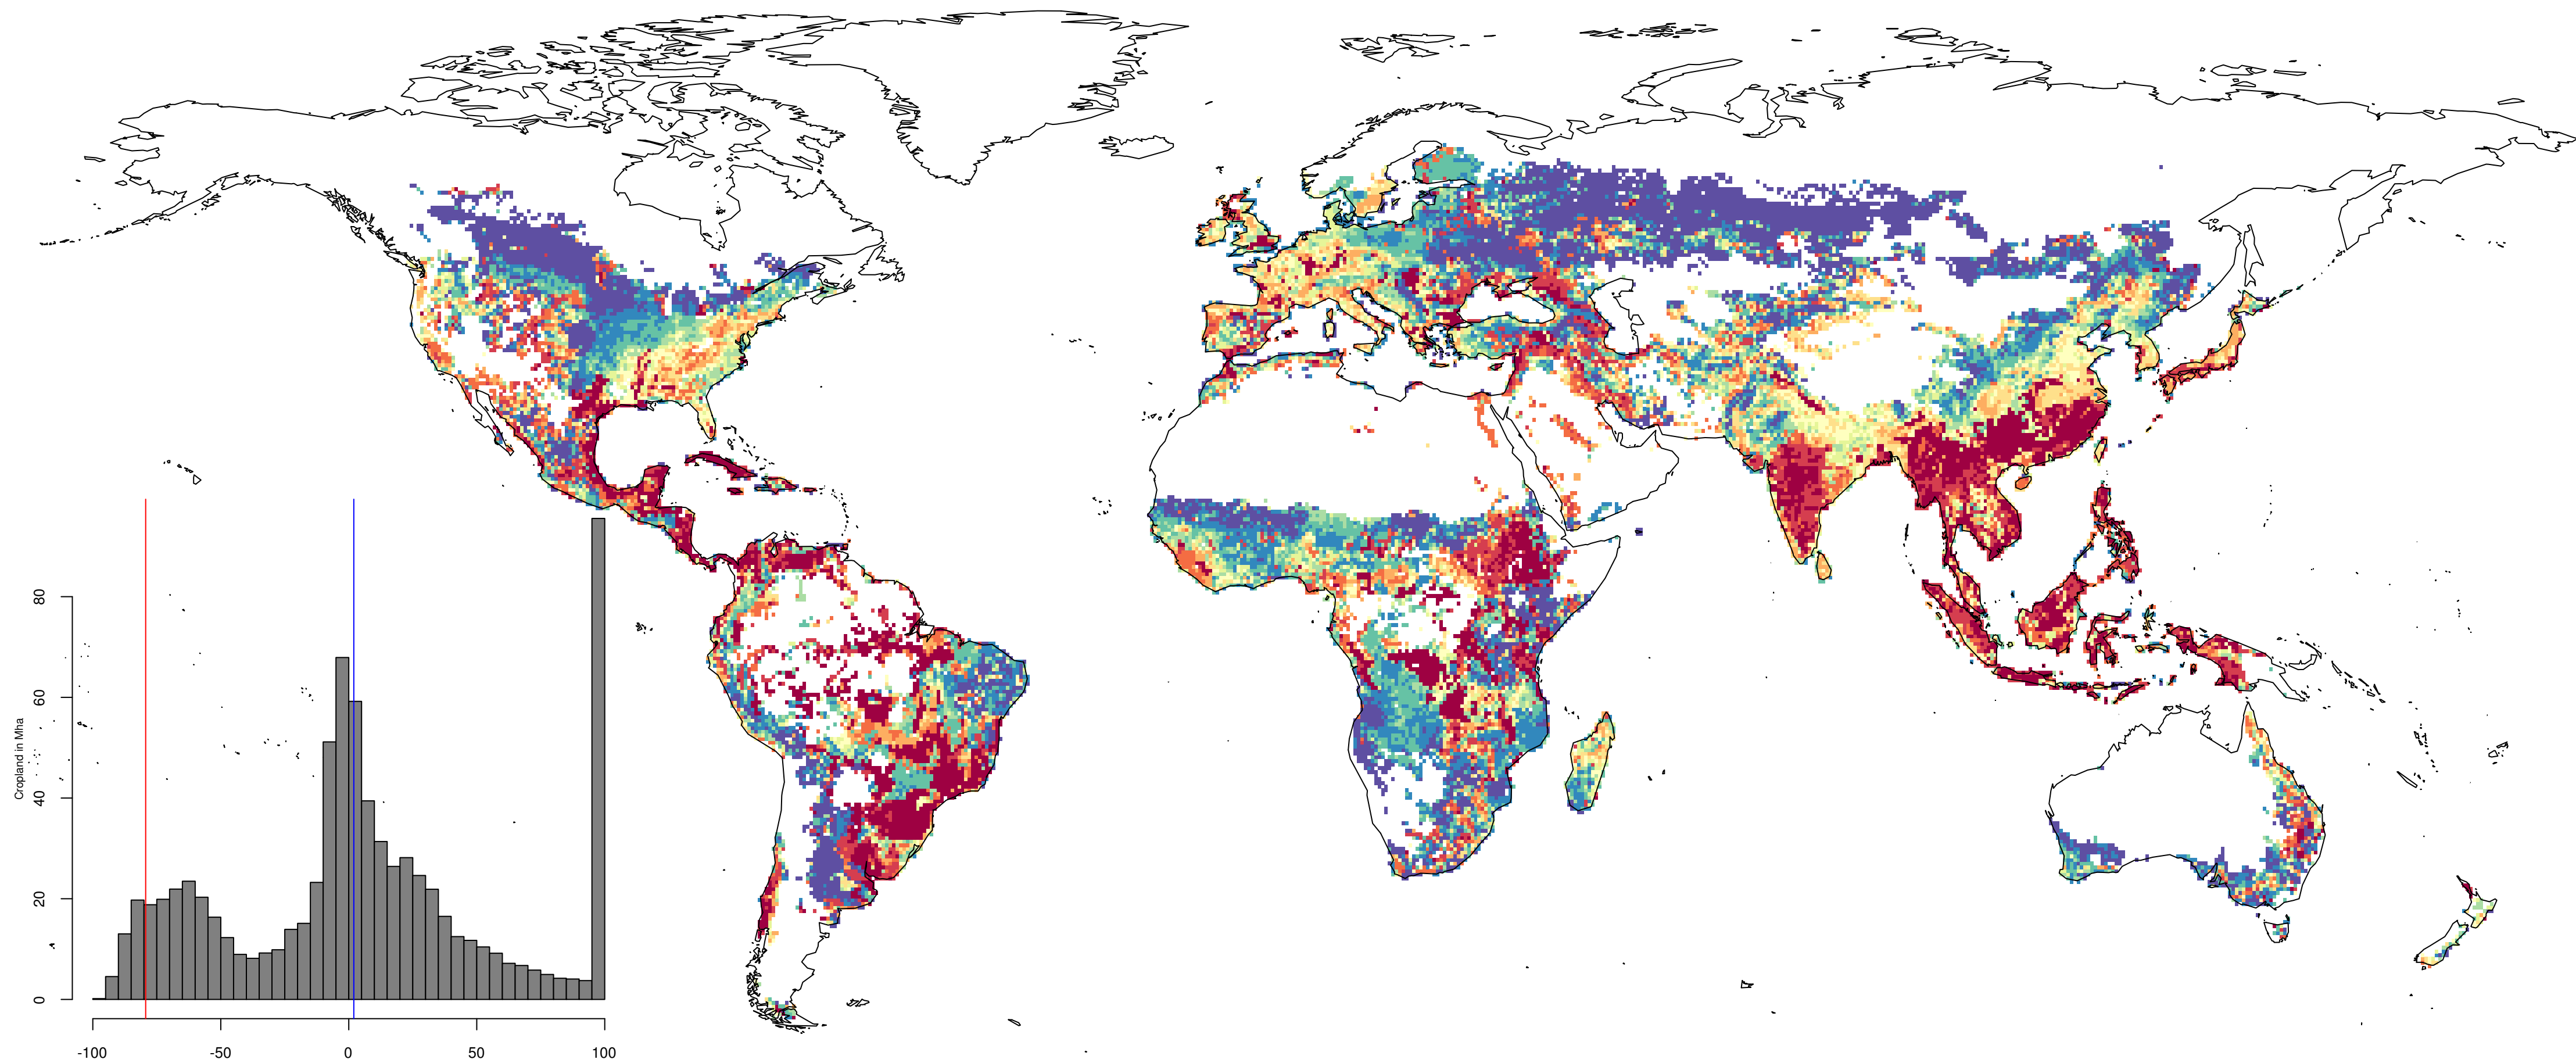

Relative change leaching from T\_R (%)

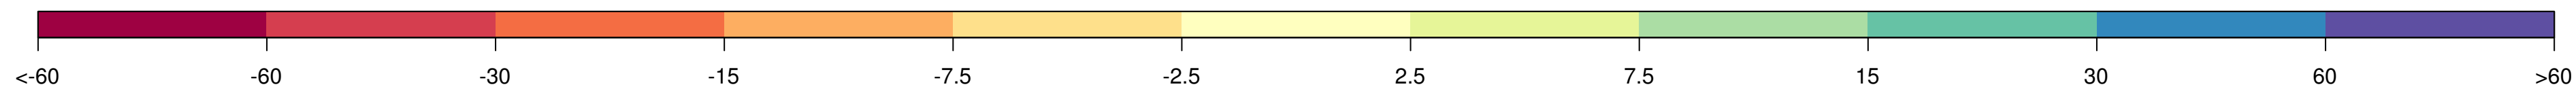

Supplement: Supplementary file 1 [file gmd-12-2419-2019-supplement.zip]

A

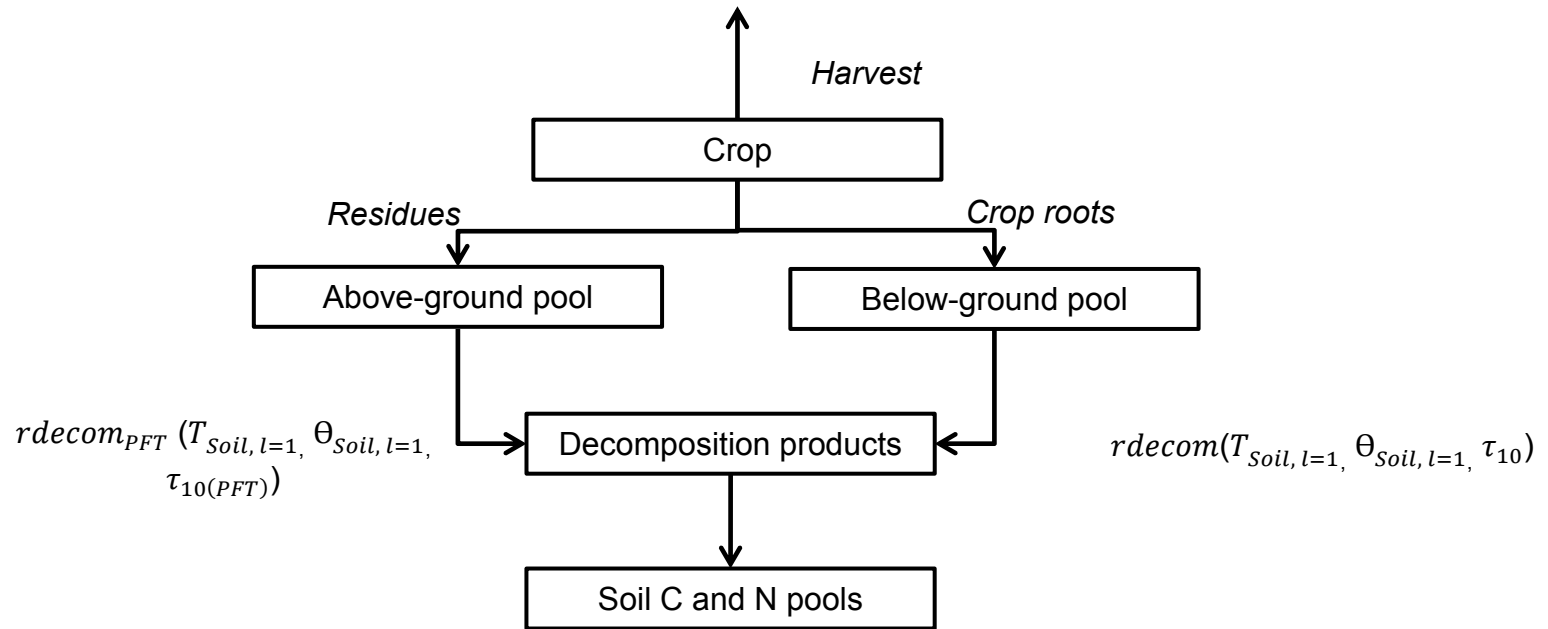

B

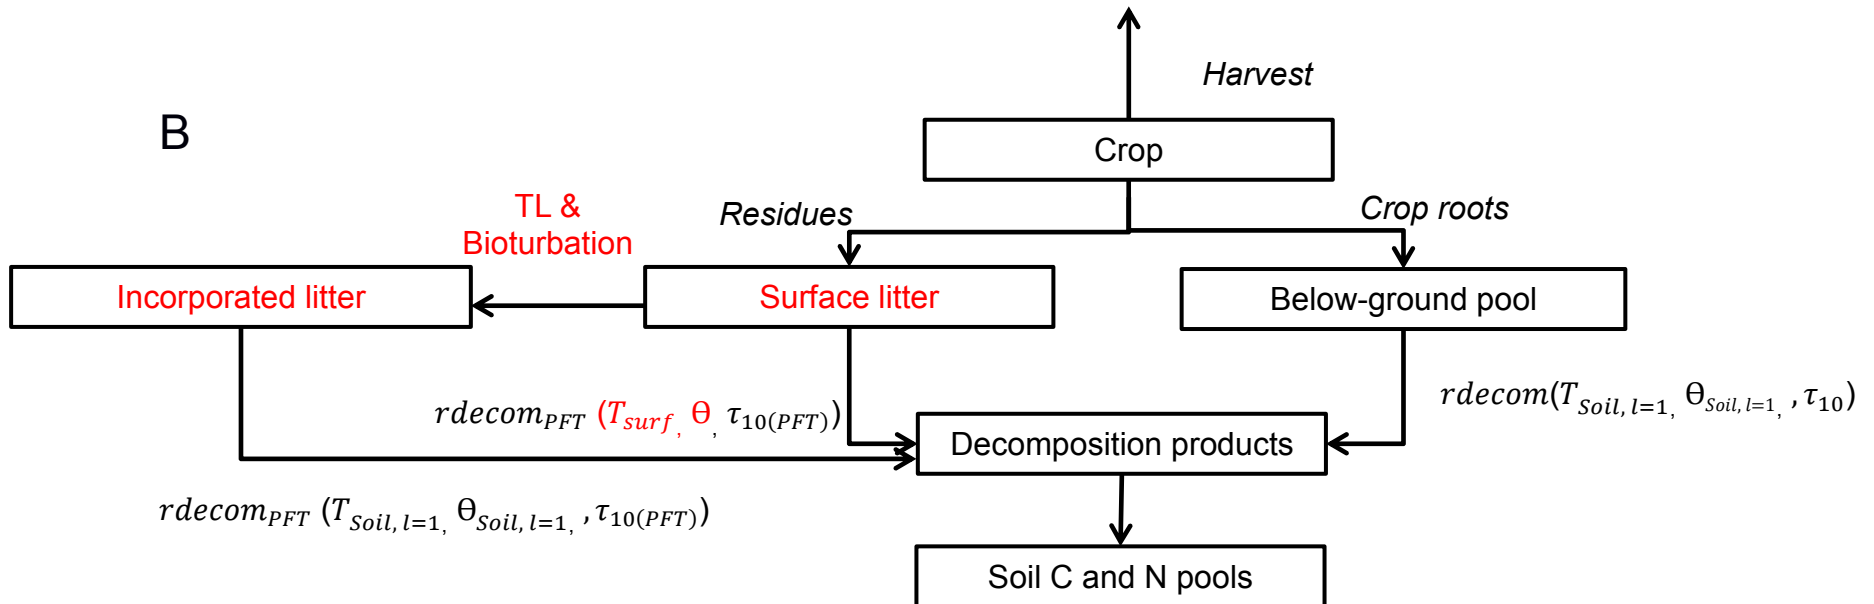

Supplement: Supplementary file 5 [file gmd-12-2419-2019-supplement.zip]
